# Supplementary material
Source: PubMed Central journal article supplement (PMC5676239)
Supplement: 1157TableS1.pdf [file 1157TableS1.pdf]

**Table S 1 Heritability of PEV**

| Variable  | <i>CyO</i> background |       |        | <i>Df(2L)2802</i> background |       |       |
|-----------|-----------------------|-------|--------|------------------------------|-------|-------|
|           | PC1                   | PC2   | PC3    | PC1                          | PC2   | PC3   |
| Line      | 59.8%                 | 45.3% | 44.0%  | 57.7%                        | 47.8% | 55.8% |
| Vial      | < 0.1%                | 0.5%  | < 0.1% | < 0.1%                       | 0.2%  | 0.2%  |
| Residuals | 40.2%                 | 54.3% | 56.0%  | 42.3%                        | 52.0% | 44.0% |
