# Supplementary material
Source: PubMed Central journal article supplement (PMC5676239)
Supplement: 1157TableS2.pdf [file 1157TableS2.pdf]

**Table S 2 GWAS top ranked associations by P-value**

| Position    | Alleles | Gene           | Class      | <i>CyO</i> background |                      |      | <i>Df(2L)2802</i> background |                      |      |
|-------------|---------|----------------|------------|-----------------------|----------------------|------|------------------------------|----------------------|------|
|             |         |                |            | AF                    | P-value              | Rank | AF                           | P-value              | Rank |
| 2L 12252172 | T/C     | <i>Aret</i>    | Intron     | NA                    | NA                   | NA   | 0.095                        | 1.3x10 <sup>-5</sup> | 5    |
| 2R 11802982 | C/T     | <i>Sli</i>     | Intron     | NA                    | NA                   | NA   | 0.274                        | 1.6x10 <sup>-5</sup> | 9    |
| 2R 12408574 | T/C     | <i>Sema-2a</i> | Intron     | 0.126                 | 1.8x10 <sup>-5</sup> | 6    | 0.124                        | 1.7x10 <sup>-5</sup> | 10   |
| 2R 18531570 | T/C     | NA             | Intergenic | 0.051                 | 3.1x10 <sup>-5</sup> | 8    | 0.05                         | 3.5x10 <sup>-5</sup> | 19   |
| 3L 1775145  | A/G     | <i>CG13933</i> | 5'UTR      | 0.34                  | 5.8x10 <sup>-6</sup> | 3    | 0.344                        | 3.2x10 <sup>-6</sup> | 3    |
| 3L 2081047  | A/G     | <i>sls</i>     | Synonymous | 0.116                 | 2.4x10 <sup>-5</sup> | 7    | 0.113                        | 2.1x10 <sup>-5</sup> | 13   |
| 3L 2288054  | G/T     | <i>DmsR-2</i>  | Intron     | 0.198                 | 9.8x10 <sup>-6</sup> | 5    | 0.194                        | 1.3x10 <sup>-5</sup> | 6    |
| 3L 2568884  | T/C     | <i>msn</i>     | Intron     | 0.375                 | 4.0x10 <sup>-6</sup> | 2    | 0.378                        | 1.3x10 <sup>-5</sup> | 7    |
| 3L 3595434  | T/G     | <i>Eip63E</i>  | Intron     | 0.219                 | 1.2x10 <sup>-6</sup> | 1    | 0.214                        | 1.7x10 <sup>-6</sup> | 1    |
| 3L 5909455  | T/C     | <i>CG13288</i> | Intron     | 0.202                 | 9.2x10 <sup>-6</sup> | 4    | 0.208                        | 3.2x10 <sup>-6</sup> | 2    |
| 3L 5909456  | G/C     | <i>CG13288</i> | Intron     | 0.208                 | 3.5x10 <sup>-5</sup> | 11   | 0.214                        | 1.3x10 <sup>-5</sup> | 4    |
| 3L 12852675 | C/G     | <i>CG32107</i> | Nonsyn.    | 0.333                 | 3.4x10 <sup>-5</sup> | 9    | 0.337                        | 1.2x10 <sup>-4</sup> | 78   |
| 3L 12852676 | T/C     | <i>CG32107</i> | Nonsyn.    | 0.333                 | 3.4x10 <sup>-5</sup> | 10   | 0.337                        | 1.2x10 <sup>-4</sup> | 79   |
| 3R 4014584  | C/T     | NA             | Intergenic | NA                    | NA                   | NA   | 0.116                        | 1.5x10 <sup>-5</sup> | 8    |
