# Supplementary material
Source: PubMed Central journal article supplement (PMC5676239)
Supplement: 1157TableS3.pdf [file 1157TableS3.pdf]

**Table S 3 Known autosomal genic modifiers of PEV**

| Chromosome        |                     |                   |                    |  |
|-------------------|---------------------|-------------------|--------------------|--|
| 2L                | 2R                  | 3L                | 3R                 |  |
| <i>abo</i>        | <i>Asx</i>          | <i>AGO2</i>       | <i>Ace</i>         |  |
| <i>aub</i>        | <i>Atf-2</i>        | <i>asf1</i>       | <i>Acf1</i>        |  |
| <i>barr</i>       | <i>BEAF-32</i>      | <i>ash1</i>       | <i>Bin1</i>        |  |
| CG8677            | <i>bw</i>           | <i>brm</i>        | <i>bon</i>         |  |
| <i>Chd1</i>       | <i>Cap-G</i>        | <i>E(z)</i>       | <i>cav</i>         |  |
| <i>chm</i>        | <i>Dcr-2</i>        | <i>FRG1</i>       | <i>D1</i>          |  |
| <i>dp</i>         | <i>dom</i>          | <i>HP4</i>        | <i>Dcr-1</i>       |  |
| <i>Etl1</i>       | <i>Dp1</i>          | <i>Jarid2</i>     | <i>E(var)3-9</i>   |  |
| <i>glu</i>        | <i>E(Pc)</i>        | <i>JIL-1</i>      | <i>E2f</i>         |  |
| <i>Hel25E</i>     | <i>egg</i>          | <i>msl-3</i>      | <i>Fmr1</i>        |  |
| <i>kis</i>        | <i>LamC</i>         | <i>not</i>        | <i>gpp</i>         |  |
| <i>lid</i>        | <i>lat</i>          | <i>Pc</i>         | <i>His2Av</i>      |  |
| <i>lt</i>         | <i>Nap1</i>         | <i>pzg</i>        | <i>Invadolysin</i> |  |
| <i>lwr</i>        | <i>Pcl</i>          | <i>rept</i>       | <i>jumu</i>        |  |
| <i>Mcm10</i>      | <i>PCNA</i>         | <i>Rpd3</i>       | <i>MBD-like</i>    |  |
| <i>Mt2</i>        | <i>Psc</i>          | <i>RpLP0</i>      | <i>Mekk1</i>       |  |
| <i>piwi</i>       | <i>psq</i>          | <i>Sgf11</i>      | <i>mod</i>         |  |
| <i>Psf2</i>       | <i>SMC2</i>         | <i>sti</i>        | <i>mod(mdg4)</i>   |  |
| <i>r2d2</i>       | <i>Su(var)2-10</i>  | <i>stwl</i>       | <i>mor</i>         |  |
| <i>Sam-S</i>      | <i>Su(var)2-HP2</i> | <i>Su(var)3-3</i> | <i>MRG15</i>       |  |
| <i>Sir2</i>       | <i>Su(z)2</i>       | <i>Su(z)12</i>    | <i>Orc2</i>        |  |
| <i>Sos</i>        |                     | <i>SuUR</i>       | <i>osa</i>         |  |
| <i>Su(var)205</i> |                     | <i>Trl</i>        | <i>polybromo</i>   |  |
| <i>vig</i>        |                     | <i>Ubp64E</i>     | <i>Pp1-87B</i>     |  |
|                   |                     |                   | <i>pr-set7</i>     |  |
|                   |                     |                   | <i>puc</i>         |  |
|                   |                     |                   | <i>Rga</i>         |  |
|                   |                     |                   | <i>Sce</i>         |  |
|                   |                     |                   | <i>Scm</i>         |  |
|                   |                     |                   | <i>Snr1</i>        |  |
|                   |                     |                   | <i>spn-E</i>       |  |
|                   |                     |                   | <i>Su(var)3-7</i>  |  |
|                   |                     |                   | <i>Su(var)3-9</i>  |  |
|                   |                     |                   | <i>trx</i>         |  |
|                   |                     |                   | <i>vig2</i>        |  |
|                   |                     |                   | <i>XNP</i>         |  |
